# Supplementary material for: An all-fibrous, permeable, adhesive, and stretchable self-powered electronic skin for sign language recognition
Source: Royal Society of Chemistry journal article supplement (doi:10.1039/d4ta05825a), 2024-01-01
Supplement: d4ta05825a2.pdf [file d4ta05825a2.pdf]

Supplementary information

## All-fibrous, permeable, adhesive, and stretchable self-powered electronic skin for sign language recognition

Fan Chen,<sup>‡</sup><sup>a</sup> Xian Song,<sup>‡</sup><sup>a,c</sup> Jingjing Fu,<sup>a</sup> Jiaheng Liang,<sup>a</sup> Junhua Zhou,<sup>a</sup> Jiehua Cai,<sup>a</sup>

Yufei Zhang,<sup>b</sup> Mengjia Zhu,<sup>f</sup> Yichun Ding,<sup>b,f</sup> Jinxing Jiang,<sup>b</sup> Zijian Chen,<sup>b</sup> Youchao

Qi,<sup>b</sup> Zhihao Zhou,<sup>a</sup> Qiyao Huang,<sup>b,c</sup> Yingying Zhang,<sup>f</sup> and Zijian Zheng<sup>\*a,b,c,d</sup>

<sup>a</sup> Department of Applied Biology and Chemical Technology, The Hong Kong Polytechnic University, Hong Kong SAR, China.

<sup>b</sup> School of Fashion and Textiles, The Hong Kong Polytechnic University, Hong Kong SAR, China.

<sup>c</sup> Research Institute for Intelligent Wearable Systems (RI-IWEAR), The Hong Kong Polytechnic University, Hong Kong SAR, China.

<sup>d</sup> Research Institute for Smart Energy (RISE), The Hong Kong Polytechnic University, Hong Kong SAR, China.

<sup>e</sup> Department of Sports Science, Zhejiang University, Hangzhou, China.

<sup>f</sup> Department of Chemistry, Tsinghua University, Beijing, China.

<sup>‡</sup> These authors contributed equally to this work.

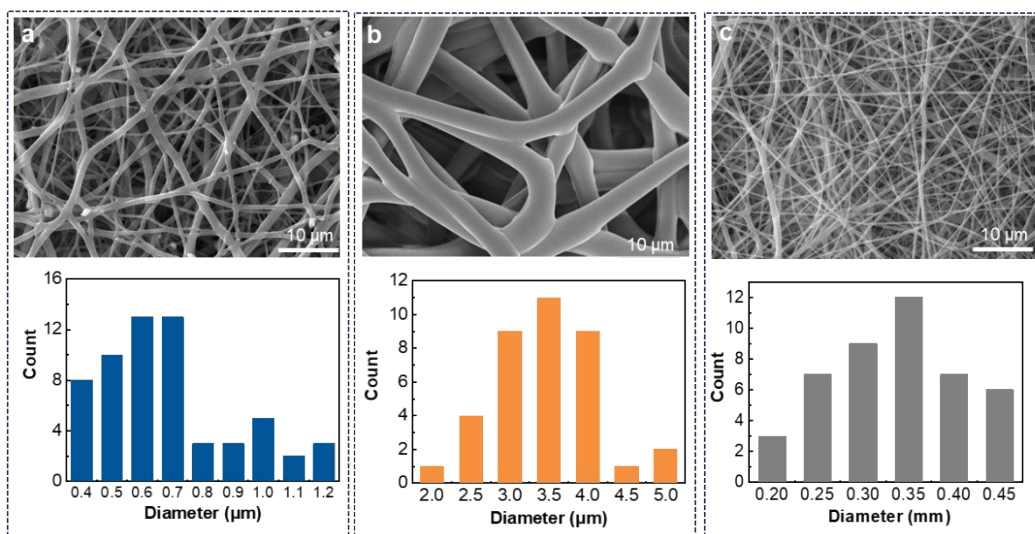

**Supplementary Figure 1.** a-c, SEM images and diameter distributions of TPU@P(VDF-TrFE) core-sheath fiber mat (a), TPU fiber mat (b), and adhesive PAAND fiber mat (c).

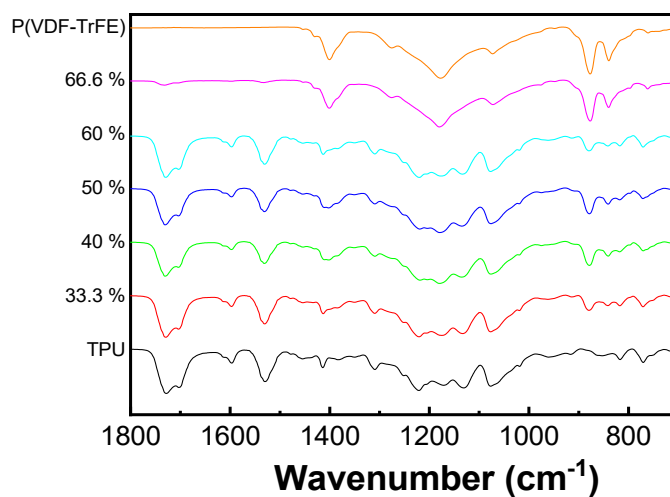

**Supplementary Figure 2.** Fourier transform infrared spectroscopy (FT-IR) spectrums of TPU, P(VDF), and TPU@P(VDF-TrFE) core-sheath fiber mats.

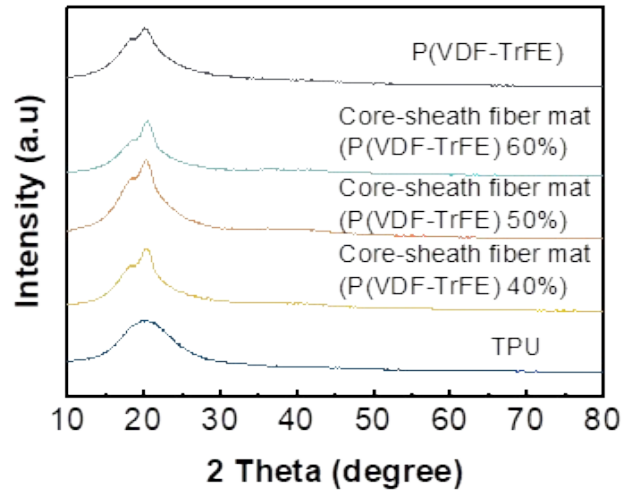

**Supplementary Figure 3.** X-Ray diffraction (XRD) patterns of TPU, P(VDF), and TPU@P(VDF-TrFE) core-sheath fiber mats.

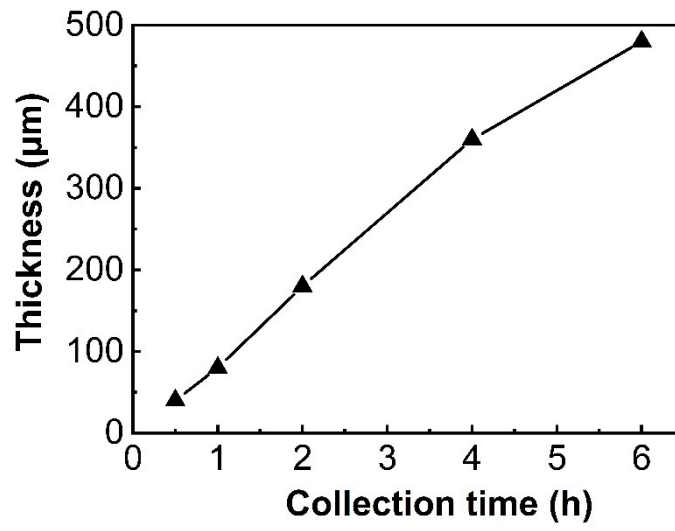

**Supplementary Figure 4.** Effect of collection time during electrospinning on the thickness for TPU@P(VDF-TrFE) core-sheath fiber mats.

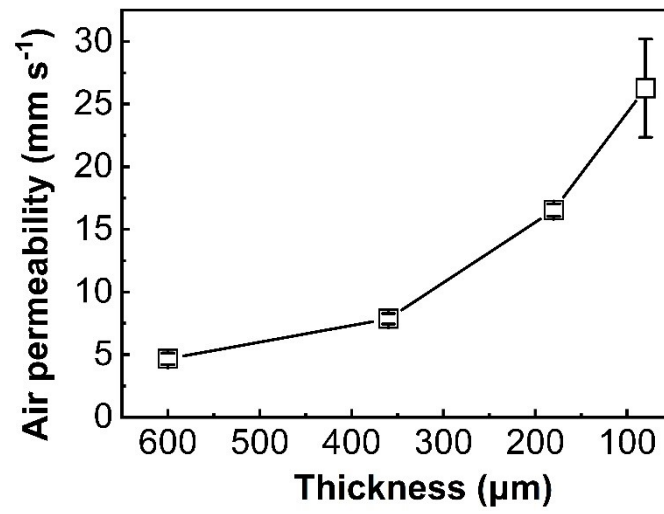

**Supplementary Figure 5.** Air permeability of core-sheath TPU@P(VDF-TrFE) fiber mat with varying thicknesses.

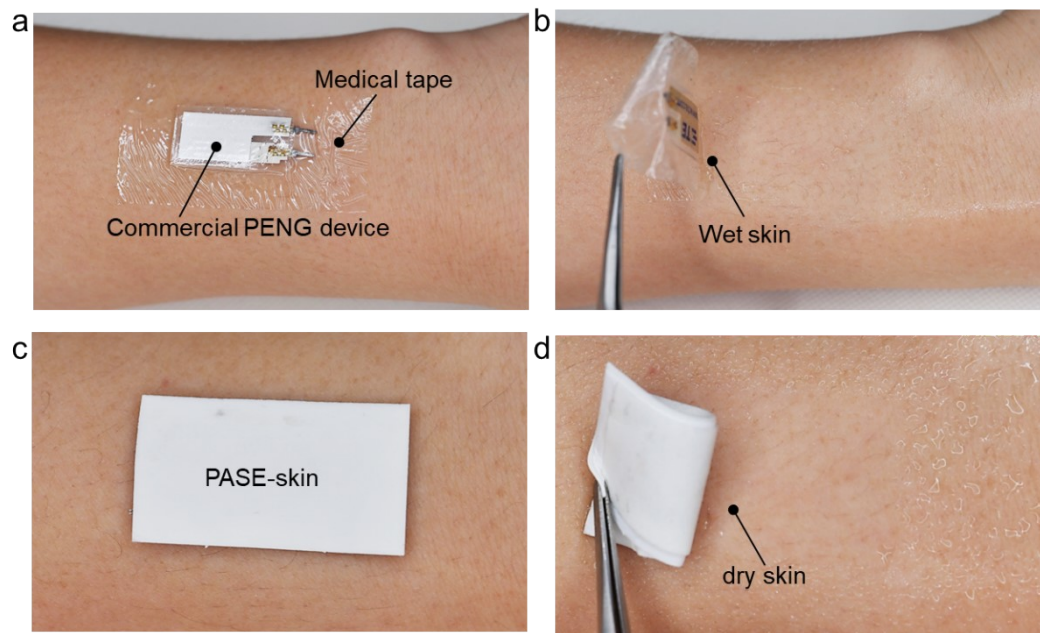

**Supplementary Figure 6.** Digital images of commercial PENG device attached to the human skin before (a) and after sporting (b) and PASE-skin adhered to the human skin before (c) and after sporting (d).

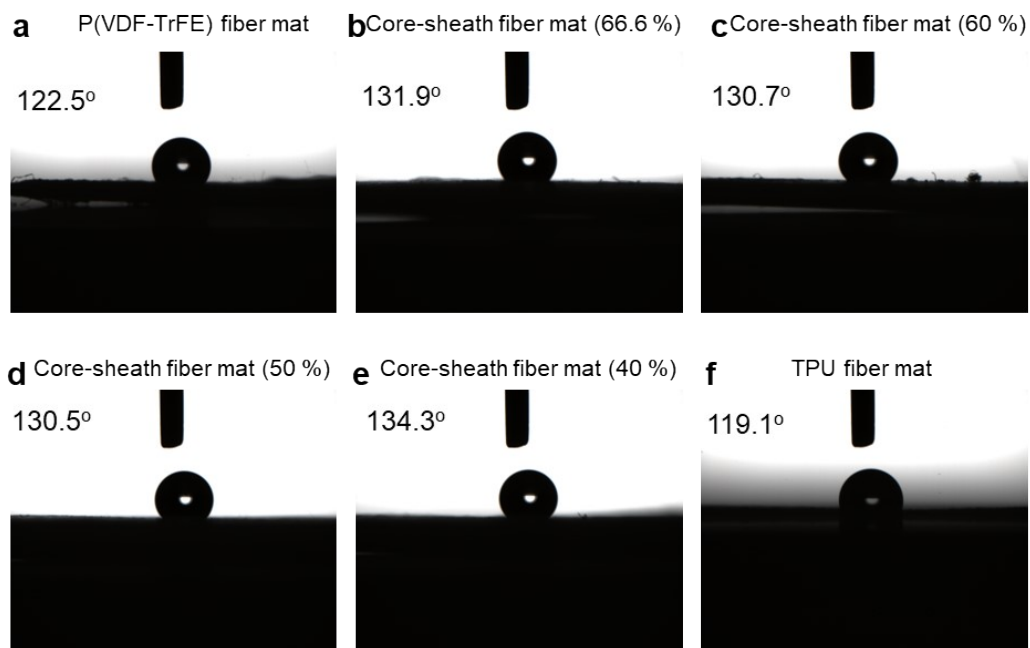

**Supplementary Figure 7.** Water contact angle of P(VDF-TrFE) fiber mat (**a**), TPU@P(VDF-TrFE) core-sheath fiber mat of P(VDF-TrFE) content of 66.6% (**b**), 60% (**c**), 50% (**d**), and 40% (**e**), and TPU fiber mat (**f**).



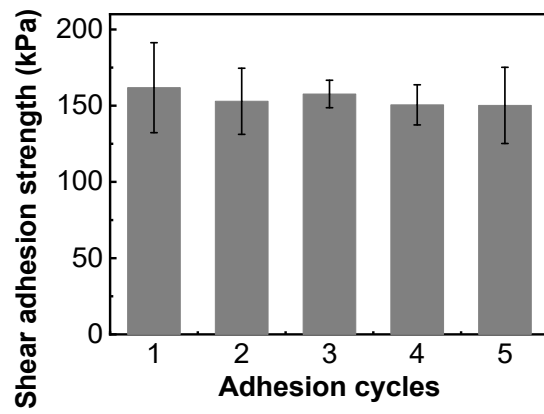

**Supplementary Figure 8.** Cyclic adhesion tests for the PASE-skin.

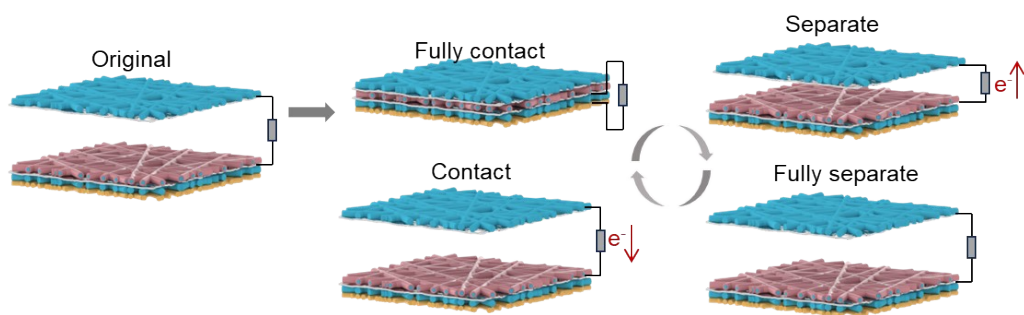

**Supplementary Figure 9.** Working mechanism of the PASE-skin device.

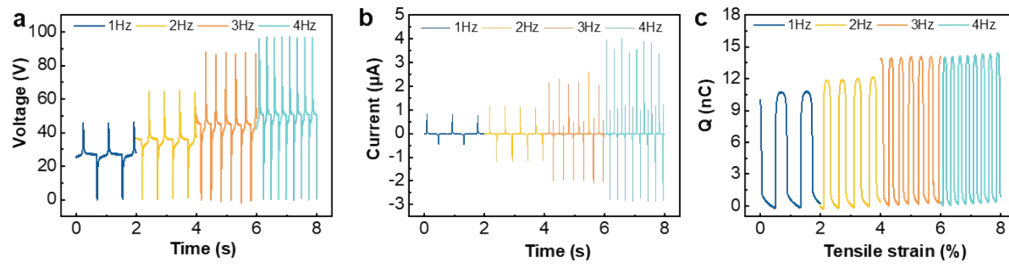

**Supplementary Figure 10.** a-c, Open-circuit voltage (b), short-circuit current (c) of the TPU@P(VDF-TrFE) core-sheath fiber mat (P(VDF-TrFE) ratio = 40%) with different contact-release frequencies.

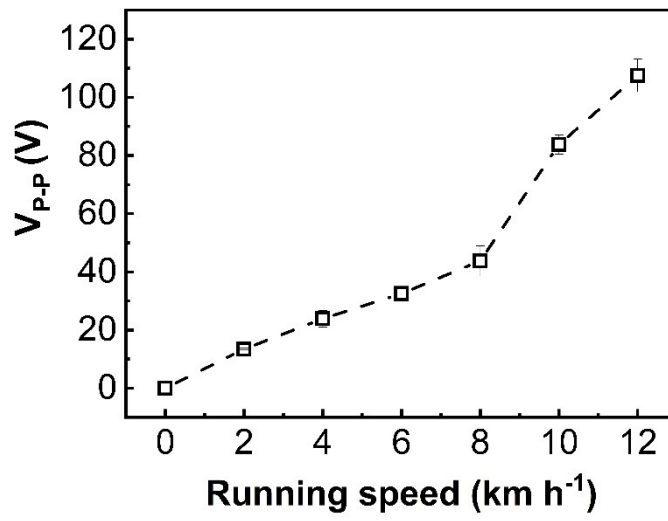

**Supplementary Figure 11.** The peak-to-peak voltage (V<sub>p-p</sub>) of the PASE-skin attached to the popliteal fossa to record running speeds.

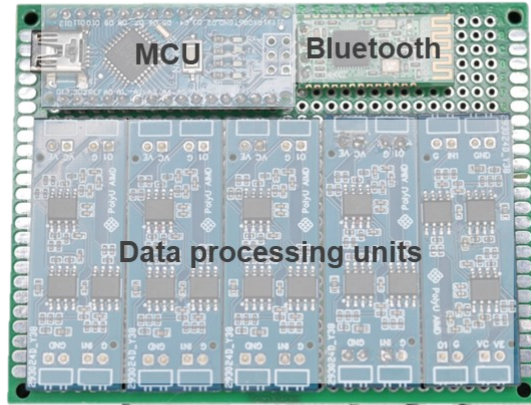

**Supplementary Figure 12.** Digital image of the printed circuit board (PCB) with a microprogrammed control unit, a Bluetooth, and five data processing units for amplifying, converting, and transmitting the signals from PASE-skin.

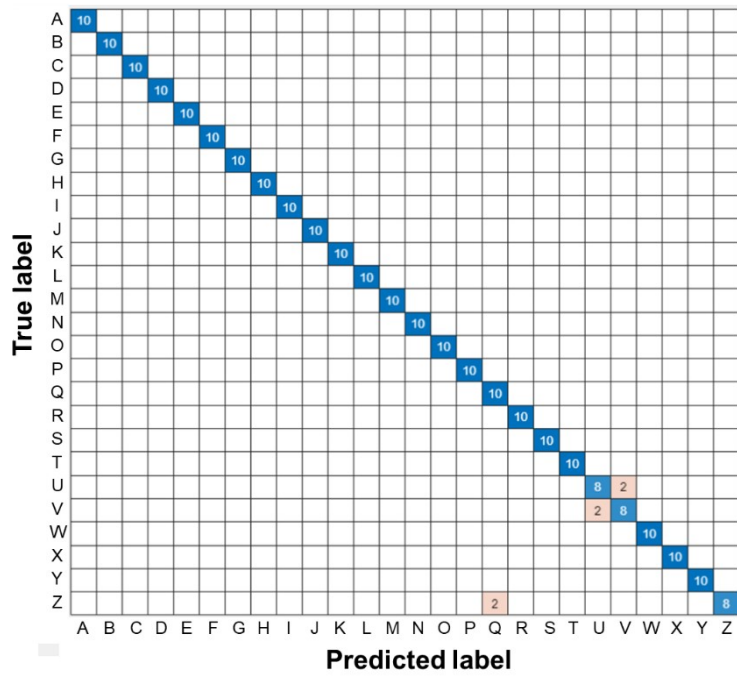

**Supplementary Figure 13.** Confusion matrix of the 26 types of alphabets from “A” to “Z” assisted by machine learning.

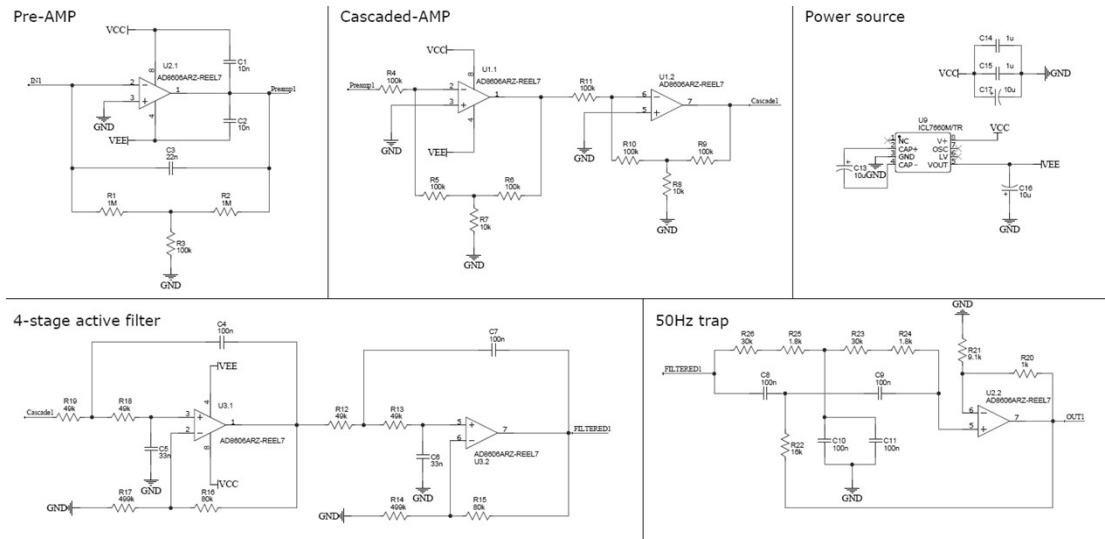

Supplementary Figure 14. Circuit diagram of signal processing unit.

**Supplementary Table 1. Comparison of self-powered sensors in adhesion, permeability, stretchability properties**

| Materials                          | Permeability                                                       | Stretchability      | Adhesion                | Application                       | Ref. |
|------------------------------------|--------------------------------------------------------------------|---------------------|-------------------------|-----------------------------------|------|
| <b>Core-sheath fiber mat</b>       | <b>678 g m<sup>-2</sup> day<sup>-1</sup></b>                       | <b>600%</b>         | <b>147 kPa</b>          | <b>Gesture recognition system</b> |      |
| <b>Liquid-metal fiber mat</b>      |                                                                    |                     |                         |                                   |      |
| PLGA/PVA fiber mat                 | 120 mm s <sup>-1</sup>                                             | 300%<br>(substrate) | /                       | E-skin                            | [1]  |
| P(VDF-TrFE) fiber mat              | 61.30 mm s <sup>-1</sup>                                           | /                   | /                       | E-textile                         | [2]  |
| Conductive fabric                  |                                                                    |                     |                         |                                   |      |
| CNT/PVDF-HFP fiber mat             | 12 kg m <sup>-2</sup> day <sup>-1</sup><br>(38°C)                  | /                   | 8 kPa                   | Plant sensor                      | [3]  |
| P(VDF-TrFE)/PA66 fiber mat         | 164 mm s <sup>-1</sup><br>531 kg m <sup>-2</sup> day <sup>-1</sup> | /                   | /                       | Self-powered E-textile            | [4]  |
| Stainless steel yarn               |                                                                    |                     |                         |                                   |      |
| LM/SBS fiber mat/hydrogel          | /                                                                  | 500%                | 0.28 N cm <sup>-1</sup> | Gesture recognition system        | [5]  |
| P(VDF-TrFE) fiber mat              | /                                                                  | 30%                 | /                       | Mechanical sensor                 | [6]  |
| PDMS/Au                            |                                                                    |                     |                         |                                   |      |
| PVDF-HFP fiber mat                 | Yes                                                                | /                   | /                       | E-textile                         | [7]  |
| PVDF fiber mat                     | /                                                                  | /                   | /                       | Self-powered system               | [8]  |
| PET/Al                             |                                                                    |                     |                         |                                   |      |
| PVDF/PAN fiber mat                 | 13.99 kg m <sup>-2</sup> d <sup>-1</sup>                           | 40%                 | /                       | Health monitoring                 | [9]  |
| Mxene/CNT                          |                                                                    |                     |                         |                                   |      |
| SEBS/PVDF-HFP fiber mat            | 913 g m <sup>-2</sup> day <sup>-1</sup>                            | 150%                | /                       | E-skin                            | [10] |
| Ag flakes/LM                       |                                                                    |                     |                         |                                   |      |
| Perovskite/SEBS/PVDF-HFP fiber mat | 10 kg m <sup>-2</sup> d <sup>-1</sup> ,                            | 100%                | /                       | Energy harvesters                 | [11] |
| Fluorinated film/aluminum foil     | /                                                                  | /                   | 16 N                    | Energy harvesters                 | [12] |
| PVDF/PVA fiber mat                 |                                                                    |                     |                         |                                   |      |



## **Description of videos**

**Supplementary video 1.** Demonstration of the operation of real-time gesture recognition by the PASE-skin.

## References

- [1] X. Peng, K. Dong, C. Ye, Y. Jiang, S. Zhai, R. Cheng, D. Liu, X. Gao, J. Wang, Z. L. Wang, *Science Advances*, 2020, **6**, eaba9624.
- [2] W. Yang, W. Gong, C. Hou, Y. Su, Y. Guo, W. Zhang, Y. Li, Q. Zhang, H. Wang, *Nature Communications*, **2019**, *10*, 5541.
- [3] L. Lan, J. Xiong, D. Gao, Y. Li, J. Chen, J. Lv, J. Ping, Y. Ying, P. S. Lee, *ACS Nano*, 2021, **15**, 5307-5315.
- [4] X. Guan, B. Xu, M. Wu, T. Jing, Y. Yang, Y. Gao, *Nano Energy* 2021, **80**, 105549.
- [5] H. Zhou, W. Huang, Z. Xiao, S. Zhang, W. Li, J. Hu, T. Feng, J. Wu, P. Zhu, Y. Mao, *Advanced Functional Materials*, 2022, **32**, 2208271.
- [6] S. H. Park, H. B. Lee, S. M. Yeon, J. Park, N. K. Lee, *ACS Appl. Mater. Interfaces*, 2016, **8**, 24773-24781.
- [7] Z. Zheng, X. Ma, M. Lu, H. Yin, L. Jiang, Y. Guo, *ACS Appl. Mater. Interfaces*, **2024**, *16*, 10746-10755.
- [8] K. Shi, B. Sun, X. Huang, P. Jiang, *Nano Energy*, 2018, **52**, 153-162.
- [9] C. Zhi, S. Shi, S. Zhang, Y. Si, J. Yang, S. Meng, B. Fei, J. Hu, *Nano-Micro Letters*, 2023, **15**, 60.
- [10] Y. Li, J. Xiong, J. Lv, J. Chen, D. Gao, X. Zhang, P. S. Lee, *Nano Energy*, 2020, **78**, 105358.
- [11] F. Jiang, X. Zhou, J. Lv, J. Chen, J. Chen, H. Kongcharoen, Y. Zhang, P. S. Lee, *Advanced Materials*, 2022, **34**, e2200042.
- [12] W. Du, J. Nie, Z. Ren, T. Jiang, L. Xu, S. Dong, L. Zheng, X. Chen, H. Li, *Nano Energy*, 2018, **51**, 260-269.
